# Supplementary material for: Recruiting Perovskites to Degrade Toxic Trinitrotoluene
Source: MDPI journal article supplement (doi:10.3390/ma14237387), 2021-12-02
Supplement: s1 [file s1]

# Recruiting Perovskites to Degrade Toxic Trinitrotoluene

Yuri A. Mastrikov, Roman Tsyshevsky, Fenggong Wang and Maija M. Kuklja \*

Department of Materials Science and Engineering, University of Maryland, College Park 20742, MD, USA; yuri@umd.edu (Y.A.M.); rtsyshev@umd.edu (R.T.); fenggong.wang@gmail.com (F.W.)

\* Correspondence: mkuklja@nsf.gov

**Table S1.** Calculated lattice parameters of BTO, BSTO, and STO ideal bulk crystals in  $R3m$  space group ( $\alpha=90^\circ$ ) and the (001)  $4a_0 \times 4a_0$  surface cell 7-plane slab with the  $5a_0$ -wide vacuum gap.

| Lattice parameter | Material | BTO                       | BSTO | STO                       |
|-------------------|----------|---------------------------|------|---------------------------|
| $a_0$ , Å         | bulk     | 4.05 (4.00 <sup>a</sup> ) | 4.01 | 3.95 (3.90 <sup>b</sup> ) |
|                   | surface  | 4.03                      | 3.97 | 3.92                      |

<sup>a</sup> Experimental lattice constants of BTO were taken from ref.<sup>1</sup>.

<sup>b</sup> Experimental lattice constants of STO were taken from ref.<sup>2</sup>.

**Citation:** Mastrikov, Y.A.; Tsyshevsky, R.; Wang, F.; Kuklja, M.M. Recruiting Perovskites to Degrade Toxic Trinitrotoluene. *Materials* **2021**, *14*, 7387.

<https://doi.org/10.3390/ma14237387>

Academic Editor: Klaus Stowe

Received: 21 October 2021

Accepted: 27 November 2021

Published: 2 December 2021

**Publisher's Note:** MDPI stays neutral with regard to jurisdictional claims in published maps and institutional affiliations.

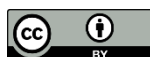

**Copyright:** © 2021 by the authors. Submitted for possible open access publication under the terms and conditions of the Creative Commons Attribution (CC BY) license (<http://creativecommons.org/licenses/by/4.0/>).
